1 Barrier effects on the spatial distribution of *Xylella*  
2 *fastidiosa* in Alicante, Spain

3 Martina Cendoya<sup>1</sup>, Ana Hubel<sup>1</sup>, David Conesa<sup>2</sup>, and Antonio Vicent<sup>1</sup>

4 <sup>1</sup>Centre de Protecció Vegetal i Biotecnologia, Institut Valencià  
5 d'Investigacions Agràries (IVIA), 46113 Moncada, Spain.

6 <sup>2</sup>Valencia Bayesian Research Group (VaBaR), Departament d'Estadística i  
7 Investigació Operativa, Universitat de València. C/ Dr. Moliner 50, 46100  
8 Burjassot (València), Spain.

9

## Abstract

10 Spatial models often assume isotropy and stationarity, implying that spatial dependence is  
11 direction invariant and uniform throughout the study area. However, these assumptions are  
12 violated when dispersal barriers are present in the form of geographical features or disease  
13 control interventions. Despite this, the issue of non-stationarity has been little explored in  
14 the context of plant health. The objective of this study was to evaluate the influence of  
15 different barriers in the distribution of the quarantine plant pathogenic bacterium *Xylella*  
16 *fastidiosa* in the demarcated area in Alicante, Spain. Occurrence data from the official sur-  
17 veys in 2018 were analyzed with four spatial Bayesian hierarchical models: i) a stationary  
18 model representing a scenario without any control interventions or geographical features;  
19 ii) a model with mountains as physical barriers; iii) a model with a continuous or iv) dis-  
20 continuous perimeter barrier as control interventions surrounding the infested area. Barriers  
21 were assumed to be totally impermeable, so they should be interpreted as areas without host  
22 plants and in which it is not possible for infected vectors or propagating plant material to pass  
23 through. Inference and prediction were performed through the integrated nested Laplace ap-  
24 proximation methodology and the stochastic partial differential equation approach. In the  
25 stationary model the posterior mean of the spatial range was 4,030.17 m 95% CI (2,907.41,  
26 5,563.88), meaning that host plants that are closer to an infected plant than this distance  
27 would be at risk for *X. fastidiosa*. This distance can be used to define the buffer zone around  
28 the infested area in Alicante. In the non-stationary models, the posterior mean of the spatial  
29 range varied from 3,860.88 m 95% CI (2,918.61, 5,212.18) in the mountain barrier model to  
30 6,141.08 m 95% CI (4,296.32, 9,042.99) in the continuous barrier model. Compared with

## Barrier effects on *Xylella* distribution

31 the stationary model, the perimeter barrier models decreased the probability of *X. fastidiosa*  
32 presence in the area outside the barrier. Differences between the discontinuous and contin-  
33 uous barrier models showed that breaks in areas with low sampling intensity resulted in a  
34 higher probability of *X. fastidiosa* presence. These results may help authorities prioritize  
35 the areas for surveillance and implementation of control measures.

36 **Keywords:** barriers; containment; disease control; eradication; INLA; non-stationary mod-  
37 els; SPDE; *Xylella fastidiosa*.

## 38 Introduction

39 The plant pathogen *Xylella fastidiosa* is a xylem-limited bacterium with a host range of  
40 more than 500 plant species (EFSA 2020). Six subspecies and a number of sequence types  
41 (STs) have been described in *X. fastidiosa*, with different genetic traits, host ranges and  
42 aggressiveness (Denancé et al. 2017). This pathogen was confined to the American  
43 continent for decades (Janse and Obradovic 2010), but in 2013 it was first reported in  
44 Europe associated with a disease causing serious losses in olives in southern Italy  
45 (Schneider et al. 2020). Since then, *X. fastidiosa* has been detected in France, Spain,  
46 Portugal and Israel, affecting multiple host plants in agricultural and natural settings. To  
47 date, the subspecies *pauca*, *fastidiosa* and *multipler* have been reported in the  
48 Mediterranean Basin (EFSA 2019). *X. fastidiosa* is regulated in the European Union (EU)  
49 as a quarantine pest (i.e. pathogen) under Regulation (EU) 2016/2031 and Commission  
50 Implementing Regulation (EU) 2019/2072. It is also included in the list of priority pests  
51 for the EU by Commission Delegated Regulation (EU) 2019/1702.

52 Two groups of xylem sap-feeding insects have been identified as the natural means by  
53 which *X. fastidiosa* spreads: sharpshooters (Cicadellidae family, Cicadellinae subfamily)  
54 and spittlebugs (Aphrophoridae, Cercopidae and Clastopteridae families) (Almeida et al.  
55 2005; Almeida and Nunney 2015). Nymphs and adults of the vectors acquire the bacteria  
56 by feeding on the xylem of infected plants. Bacteria then multiply in the insect foregut,  
57 but vectors lose infectivity with molting. Adult vectors can inoculate healthy plants  
58 immediately after acquisition and throughout their whole lifetime, although the bacterium  
59 is not transmitted to the progeny (Almeida and Purcell 2006).

60 The pathogen can be introduced and further spread into new areas with infected plant

61 material for planting or grafting (EFSA 2015). Genetic studies indicated that the *X.*  
62 *fastidiosa* subsp. *pauca* ST53 strain CoDiRO, which is decimating olive trees in Italy,  
63 originated in Central America (Giampetruzzi et al. 2017) and was probably introduced  
64 with infected coffee plants imported as ornamentals. Phylogenetic analyses also indicated  
65 that *X. fastidiosa* subsp. *multiplex* ST81 and *X. fastidiosa* subsp. *fastidiosa* ST1 were  
66 introduced into the island of Majorca, Spain, with infected almond graftings from  
67 California, US (Moralejo et al. 2020). Similarly, *X. fastidiosa* subsp. *multiplex* ST6 in  
68 Alicante, Spain, and Corsica, France, as well as ST87 from Tuscany, Italy, might have been  
69 introduced from California (Landa et al. 2020). Human-assisted movement of infected  
70 insect vectors on plants or on their own as ‘hitch-hikers’ in vehicles can also disseminate *X.*  
71 *fastidiosa*, though information on these means of spread is limited (EFSA 2015).

72 Species distribution models (SDMs) are widely used to associate the geographic settings of  
73 species with biotic and abiotic factors, establish favorable areas for the expansion of  
74 populations, develop risk maps for the potential establishment of pathogens, and predict  
75 the distribution of species in space and time, among others (Martínez-Minaya et al. 2018).  
76 These types of models can be developed with different methodologies, such as generalized  
77 linear models (GLM), generalized additive models (GAM), neural networks, maximum  
78 entropy models (e.g. Maxent) and climate envelope models (e.g. Bioclim). The literature  
79 available on the applications and methodologies of SDMs is quite extensive, with some  
80 reviews such as Guisan and Zimmermann (2000), Elith and Leathwick (2009) or  
81 Martínez-Minaya et al. (2018) that compile and describe the different modeling approaches.  
82 Several studies have been conducted on the potential distribution of *X. fastidiosa*  
83 associated with climatic factors (Bosso et al. 2016; Godefroid et al. 2019; Hernández and

84 García 2019; EFSA 2019). However, most of these models are based on the assumption  
85 that observations are independent, without taking into account the spatial dependence that  
86 often exists among the geographical locations. Failing to consider spatial correlation may  
87 lead to an overestimation of the model parameters and thus inaccurate results (Latimer  
88 et al. 2006). Advances in computational methods have made it possible to implement more  
89 complex models and, hence, a more straightforward incorporation of spatial dependencies  
90 in SDMs (Blangiardo and Cameletti 2015). Among these advances, here we will focus on  
91 hierarchical Bayesian models, which allow random effects and complex dependency  
92 structures to be incorporated easily taking into account all the non-observed uncertainties  
93 (Banerjee et al. 2004; Blangiardo and Cameletti 2015).

94 An additional and often overlooked problem in the analysis of spatial data is that models  
95 usually assume stationarity (i.e., the spatial effect is invariant to the map translation) and  
96 isotropy (i.e., the spatial effect is invariant to the map rotation), that is, the autocorrelation  
97 between two locations only depends on the Euclidean distance. However, relying on these  
98 two assumptions can produce misleading results, with unrealistic associations and/or bias  
99 in the prediction of the species distribution, when elements such as barriers that are an  
100 obstacle to the movement of the species are present in the study area. To address this  
101 issue, Bakka et al. (2019) introduced an approach that makes it possible to deal with  
102 non-stationary spatial processes where, as in our study, stationary also includes isotropy for  
103 convenience. This approach has been applied in marine species distribution studies, where  
104 the coastline was implemented as a physical barrier. In particular, in the above-mentioned  
105 work Bakka et al. (2019) modeled the distribution of fish larvae in the Finnish Archipelago  
106 (Finland), while Martínez-Minaya et al. (2019) conducted a study on the seasonal

## Barrier effects on *Xylella* distribution

107 distribution of bottlenose dolphins in the Archipelago de La Maddalena (Italy).

108 Barriers are an intrinsic part of the principles of plant disease control, i.e. exclusion,  
109 eradication, protection and resistance (Maloy 1993). Exclusion strategies aim to prevent  
110 the pathogens from entering new areas. Barriers in the form of prohibitions restricting the  
111 import of plants, interceptions through border inspections and subsequent elimination of  
112 the pathogen are enforced by legal provisions worldwide. In the case of *X. fastidiosa*, the  
113 Commission Implementing Regulation (EU) 2020/1201 establishes special requirements for  
114 the import of host plants from third countries into the EU. When exclusion fails,  
115 eradication is attempted by removing the infected plants to limit further spread of the  
116 disease. According to Commission Implementing Regulation (EU) 2020/1201, demarcated  
117 areas consisting of an infected (i.e. infested) zone and a buffer zone should be established  
118 for *X. fastidiosa*. Eradication measures should then be implemented to ensure the removal  
119 of the infected plants and control of vector populations. Special requirements are also set  
120 for the movement of specified plants from the demarcated area.

121 Protection from already established diseases can be accomplished with barriers such as  
122 screenhouses, plastic covers and distance from inoculum sources that prevent pathogens  
123 and vectors from contacting host plants. Windbreaks can also prevent the movement of  
124 pathogen propagules. In areas where *X. fastidiosa* is endemic, screen and planting barriers  
125 have been evaluated to reduce vector spread (Daugherty and Almeida 2009; Blua et al.  
126 2005). Finally, plant resistance limits the infection and multiplication of plant pathogens,  
127 acting as a barrier for the onset of disease epidemics. In this regard, recent advances have  
128 been made to obtain grapevine and olive cultivars that are resistant to *X. fastidiosa*  
129 (Krivanek et al. 2006; Giampetruzzi et al. 2016).

## Barrier effects on *Xylella* distribution

130 All these examples described above illustrate to what extent the presence of barriers and  
131 their resulting non-stationarity can shape the spatial dimension of plant disease epidemics.  
132 Nevertheless, apart from performing separate directional spatial autocorrelation analyses to  
133 study whether a process is isotropic (Madden et al. 2007), the issue of non-stationarity has  
134 been scarcely explored in the context of plant disease epidemiology.

135 Our study focuses on the demarcated area for *X. fastidiosa* in Alicante, Spain. The  
136 pathogen was first reported in this region in 2017 and since then has been under official  
137 control in accordance with EU legislation. In Alicante, *X. fastidiosa* subsp. *multiplex* ST6  
138 was identified as affecting mainly almond trees (*Prunus dulcis*). The two insect species  
139 where *X. fastidiosa* has been detected in this area are *Philaeus spumarius* L. (Hemiptera:  
140 Aphrophoridae) and *Neophilaenus campestris* Fallen (Hemiptera: Aphrophoridae) (GVA  
141 2020). Despite its relatively small extension, the study area of Alicante presents a great  
142 orographic diversity, from the sea level to mountain ranges rising to an altitude of above  
143 1,500 m. This particular geographic setting must be taken into account to model the  
144 occurrence of *X. fastidiosa*, since it can determine the presence of host plants and also  
145 affect the behavior of the vectors, thus violating the stationarity and isotropy assumption.  
146 In addition to these geographic barriers, the control measures for *X. fastidiosa* established  
147 by the EU legislation are aimed at limiting the spread of the disease, which also represents  
148 a potential dispersal barrier to be considered.

149 With all this in mind, the aim of this study is to describe how the presence of different  
150 kinds of barriers produce different results in terms of predicting the presence of a species.  
151 In particular, the occurrence of *X. fastidiosa* in Alicante was analyzed with four spatial  
152 modeling scenarios, three of them including dispersal barriers.



## 153 Methods

### 154 Database

155 The georeferenced data from the official surveys carried out for *X. fastidiosa* in Alicante in  
156 2018 were provided by the plant health authority (*Sanitat Vegetal, Generalitat*  
157 *Valenciana*). This database contained the plant species sampled, the result of the  
158 laboratory analysis being positive (i.e. presence) or negative (i.e. absence) for *X. fastidiosa*  
159 based on real-time PCR (EPPO 2019), as well as the UTM coordinates of the location  
160 where the sample was taken.

161 Samples were also collected from plant species that were not known to be natural hosts for  
162 the *X. fastidiosa* subsp. *multiplex* strains present in the study area, such as *Olea europaea*,  
163 of which 2,414 samples were collected during that period, all of them resulting negative for  
164 *X. fastidiosa*. In order to avoid biases in the estimation due to this large number of  
165 negative samples from non-host species, only the samples from plant species having at least  
166 one positive for *X. fastidiosa* were considered for further analysis. The plant species  
167 selected were: *Prunus dulcis*, *P. armeniaca*, *P. domestica*, *Calicotome spinosa*, *Rhamnus*  
168 *alaternus*, *Phagnalon saxatile*, *Helichrysum italicum*, *Polygala myrtifolia*, *Rosmarinus*  
169 *officinalis* and *Laurus nobilis*. The dataset consisted of a total of 4,205 samples, 1,151 were  
170 positive and 3,054 were negative for *X. fastidiosa*, distributed in the demarcated area of  
171 Alicante with an extension of approximately 1,346 km<sup>2</sup> (GVA 2019) (Fig. S1).

## 172 Geostatistical model

173 Considering the georeferenced data as observations made at continuous locations occurring  
174 within a defined spatial domain, they were classified as geostatistical data. One of the  
175 characteristics of this type of spatial data is that the main objective of its analysis is to  
176 enable prediction within the study region (Cressie 1993). A point-referenced spatial  
177 hierarchical model (Diggle et al. 1998) was used to model the geostatistical data, while  
178 inference and prediction were performed within the Bayesian paradigm. As posterior  
179 distributions of the parameters and hyperparameters, along with the posterior predictive  
180 distributions of the predicted values in unobserved locations, do not have analytical  
181 expressions, the integrated nested Laplace approximation (INLA) methodology (Rue et al.  
182 2009) was used to numerically approximate them.

183 Defining a hierarchical Bayesian spatial model can be seen as a three-step process. Firstly,  
184 a probability distribution must be identified for the observations available at the spatial  
185 locations. In this case, it was assumed that  $y_i$ , the occurrence of *X. fastidiosa* at location  $i$ ,  
186 follows a Bernoulli distribution (1 indicating presence and 0 absence), that is,  
187  $y_i \sim \text{Bernoulli}(\pi_i)$ , where  $\pi_i$  represents the probability of presence at location  $i$ . In a second  
188 step, this probability of presence  $\pi_i$  is linked (usually via the logit link when the response is  
189 Bernoulli) to a linear predictor and a latent Gaussian random field, whose covariance  
190 matrix  $\Sigma$  depends on two hyperparameters: the variance  $\sigma_u^2$  and the range  $r$  of the spatial  
191 effect. Finally, the third step consists in assigning the corresponding priors and hyperpriors  
192 of the parameters and hyperparameters of the model. Despite its wide acceptance, INLA  
193 cannot be directly applied when dealing with continuously indexed Gaussian fields (GF).  
194 The underlying reason is that the cost of factorizing dense covariance matrices can be

195 computationally demanding. Lindgren et al. (2011) proposed an alternative approach by  
196 using an approximate stochastic weak solution to a Stochastic Partial Differential Equation  
197 (SPDE) as a Gaussian Markov random field (GMRF) approximation to a continuous GF  
198 with Matérn covariance structure. A GMRF is a discretely indexed GF characterized by a  
199 sparse precision matrix  $Q$ , the factorizing computational cost of which is of order  $O(n^{3/2})$ ,  
200 a large computational improvement compared to the factorization of a dense covariance  
201 matrix (of order  $O^n$ ) that would imply the GF. In the approach proposed by Lindgren  
202 et al. (2011), the finite element method provides a solution to the SPDE, through the  
203 construction of a *mesh* (Appendix S1: Fig. S2a), which consists in the triangulation of the  
204 study area (Bakka et al. 2018).

205 Using this approximation, the spatial term is reparameterized as  $u \sim N(0, Q^{-1}(\kappa, \tau))$ ,  
206 where the parameters  $\kappa$  and  $\tau$  control the range ( $r$ ) and the variance ( $\sigma_u^2$ ). Specifically,  
207  $r = \sqrt{\frac{8}{\kappa}}$  and  $\sigma_u^2 = \frac{1}{4\pi\kappa^2\tau^2}$  (Lindgren et al. 2011). However, for a more intuitive  
208 interpretation, the spatial effect was parameterized in terms of the marginal standard  
209 deviation and the range (Krainski et al. 2019).

210 Therefore, the hierarchical Bayesian spatial model with the Krainski et al. (2019)

211 reparameterization can be expressed as:

$$\begin{aligned}y_i &\sim \text{Bernoulli}(\pi_i), \quad i = 1, \dots, n, \\ \text{logit}(\pi_i) &= \beta_0 + u_i, \\ P(\beta_0) &\propto 1, \\ \mathbf{u} &\sim N(0, \mathbf{Q}^{-1}(r, \sigma_u)), \\ r &\sim \text{PC-prior}(\mu_r, 0.5), \\ \sigma_u &\sim \text{PC-prior}(10, 0.01),\end{aligned}\tag{1}$$

212 where  $\pi_i$  is the probability of the presence of *X. fastidiosa* at location  $i$ ,  $\beta_0$  is the intercept,  
213 and  $\mathbf{u}$  is the spatial effect. As can be observed, the linear predictor was reduced just to the  
214 intercept, the underlying reason being that previous works had indicated a dominating  
215 effect of the spatial component compared to available covariates in the demarcated area  
216 (Cendoya et al. 2020). This model already includes the scarce prior knowledge about  
217 parameters, expressed via a non-informative improper prior for the intercept, and about  
218 the hyperparameters. In this latter case, following Fuglstad et al. (2019), Penalized  
219 Complexity priors (PC-priors) were used to express vague prior knowledge about them. In  
220 particular, a PC-prior for the range was defined as  $P(r < \mu_r) = 0.5$ , where  $\mu_r$  was chosen as  
221 50% of the diameter of the study region, while a PC-prior  $P(\sigma_u > 10) = 0.01$  was defined  
222 for the standard deviation of the spatial effect.

## 223 Non-stationarity

224 The model introduced in the previous subsection assumes stationarity and isotropy. In  
225 order to deal with non-stationarity (i.e., non-stationary and anisotropic spatial processes),  
226 the approach presented by Bakka et al. (2019) was used. As happens in stationary models,  
227 estimating and predicting in non-stationary models can be rather complicated. In their  
228 proposal, Bakka et al. (2019) approximated them also by means of the SPDE approach  
229 using the finite element method. However, in this case a system of two SPDEs is presented,  
230 one for the barrier area and the other for the remaining area, which we have also  
231 denominated as the normal area, adapting their terminology.

232 In particular, a non-stationary spatial effect  $u(s)$  is the solution to the following system of  
233 stochastic differential equations:

$$\begin{aligned} u(s) - \nabla \cdot \frac{r^2}{8} \nabla u(s) &= r \sqrt{\frac{\pi}{2}} \sigma_u W(s), \text{ for } s \in \Omega_n, \\ u(s) - \nabla \cdot \frac{r_b^2}{8} \nabla u(s) &= r_b \sqrt{\frac{\pi}{2}} \sigma_u W(s), \text{ for } s \in \Omega_b, \end{aligned} \quad (2)$$

234 where  $u(s)$  is the spatial effect,  $\Omega_n$  is the normal area and  $\Omega_b$  is the barrier area.  $r$  and  $r_b$   
235 are the ranges for the normal and barrier areas, respectively.  $\sigma_u$  is the marginal standard  
236 deviation,  $\nabla = \left( \frac{\partial}{\partial x}, \frac{\partial}{\partial y} \right)$  and  $W(s)$  denotes white noise. Note that in the barrier area the  
237 correlation is eliminated by introducing a different Matérn field, with the same standard  
238 deviation, but with a range close to zero.

## 239 Models

240 In order to analyze the effect of including barriers on the occurrence of *X. fastidiosa* in the  
241 study area, the following models were performed and compared:

242 i) **Stationary model**. Model in which both stationarity and isotropy are assumed, without  
243 any barrier. This model represents a scenario without any disease control interventions or  
244 geographical features potentially affecting the spread of the pathogen (Fig. 1a).

245 ii) **Mountain barrier model**. Non-stationary model with barriers defined by the areas  
246 over 1,065 m, the maximum altitude where a sample positive for *X. fastidiosa* was found in  
247 the study area. This model represents a scenario without any disease control interventions  
248 but with geographical features impeding the spread of the pathogen (Fig. 1b).

249 iii) **Continuous barrier model**. Non-stationary model with a continuous barrier  
250 surrounding the infested area. This barrier consisted of a perimeter band 1,000 m wide,  
251 500 m away from the outermost samples that were positive for *X. fastidiosa*. The width of  
252 the barrier was fixed to be lower than the range estimated for the stationary model. This  
253 model represents a cordon sanitaire where all host plants were removed and measures  
254 implemented to completely impede the spread of *X. fastidiosa*. For consistency, the  
255 perimeter band was also implemented along the coastline (Fig. 1c).

256 iv) **Discontinuous barrier model**. The same non-stationary model described above but  
257 with a discontinuous barrier surrounding the infested area. In this case, breaks of different  
258 sizes (1,000-3,200 m) were made in the perimeter band, facing sampled and non-sampled  
259 areas outside the barrier. This model represents a cordon sanitaire where all host plants  
260 were removed, but measures to impede the spread of *X. fastidiosa* have been implemented

261 only in some parts (Fig. 1d).

262 In the non-stationary models (ii, iii and iv), following Eq. 2,  $\Omega_b$  represented the area  
263 occupied by the barriers, i.e., the area above 1,065 m in the mountain barrier model and  
264 the area of the cordon sanitaire in continuous and discontinuous barrier models.  $\Omega_n$   
265 included the remaining area in each model.

266 All models were fitted using the INLA methodology with the R-INLA package  
267 (<http://www.r-inla.org>) for R software (R Core Team 2021). For each model a *mesh*  
268 was built, specifying in each case the barrier areas (Appendix S1: Fig. S2). In the three  
269 non-stationary models, observations in the barriers were eliminated (all of them negative  
270 samples), following the assumption that *X. fastidiosa* cannot be present in this specific  
271 area.

272 Differences between the stationary model and those with barriers, along with the  
273 differences between the discontinuous and continuous ones, were obtained by subtracting  
274 the means of their corresponding posterior predictive distributions.

## 275 Results

276 In the stationary model, the posterior mean of the intercept was -1.95 in the linear  
277 predictor scale. Taking into account that when the spatial effect is zero, the mean posterior  
278 probability of the presence of *X. fastidiosa* is equivalent to the exponential transformation  
279 of the intercept, in this case, the probability of presence given only by the intercept was  
280 0.14. The posterior mean of the spatial range was 4,030.17 m, with a 95% credible interval  
281 (CI) (2,907.41, 5,563.88) (Table 1). Therefore, we assume that two observations separated

## Barrier effects on *Xylella* distribution

282 by more than this distance were not spatially correlated, that is, they are independent.

283 The posterior mean of the intercept in the mountain barrier, continuous barrier and  
284 discontinuous barrier models was -1.88, -2.07 and -1.86, respectively (Table 1). Therefore,  
285 in areas where there was no influence of the spatial effect, through the exponential  
286 transformation of these values, a probability of presence of the pathogen of 0.15 was  
287 obtained with the mountain barrier model, 0.13 with the continuous barrier model and 0.16  
288 with the discontinuous barrier model.

289 In the mountain barrier model, a posterior mean of the spatial range of 3,860.88 m was  
290 obtained with a 95% CI (2,918.61, 5,212.18). In the continuous barrier model the range  
291 was greater than in the previous case and with more variability, obtaining a posterior mean  
292 of 6,141.08 m, with a 95% CI (4,296.32, 9,042.99). The estimation of the discontinuous  
293 barrier model resulted in a posterior mean of the range of 5,298.90 m with a 95% CI  
294 (3,813.16, 7,557.78) (Table 1).

295 The Matérn correlation function represents the spatial correlation between two  
296 observations as a function of distance, where the range is the distance from which two  
297 observations can be considered independent (Cressie 1993). The Matérn correlation  
298 function was estimated in each model using the posterior mean of the range obtained. The  
299 function was similar in the stationary and mountain barrier models, where the spatial  
300 correlation decreases quickly in the first 4,000 m. In the continuous barrier and  
301 discontinuous barrier models, the spatial correlation as a function of distance had a more  
302 gradual decrease due to the greater range obtained in the estimation (Fig. 2).

303 Given the model described in Eq. 1, the mean of the posterior predictive distribution,  
304 expressed in terms of probability, was defined by the intercept and the spatial effect. In



## Barrier effects on *Xylella* distribution

305 general, in the four modeling scenarios the probability of the presence of *X. fastidiosa* was  
306 higher in the areas where the positive samples were concentrated, being close to zero in the  
307 areas where negative samples predominated. In the non-sampled areas at distances from  
308 the observations outside the range, and thus without any influence of the spatial effect, the  
309 probability of the presence of *X. fastidiosa* only depended on the intercept. Regarding the  
310 standard deviation of the posterior predictive distribution, higher values were obtained in  
311 the non-sampled areas, while the sampled areas where *X. fastidiosa* was not detected  
312 showed very low variability (Fig. 3).

313 The range of values of the mean and standard deviation of the posterior predictive  
314 distribution was similar in all four models (Fig. 3). However, the difference between the  
315 mean of the stationary model and the mountain barrier model was negative in the area  
316 around the barrier (Fig. 4a). This implies that the probability of *X. fastidiosa* presence in  
317 those areas was higher in the mountain barrier model than in the stationary model.

318 In order to help in the interpretation of the comparison of the results of the stationary  
319 model, the continuous barrier model and the discontinuous barrier model, from now on we  
320 denominate the areas on both sides of the perimeter barrier built around the positives as  
321 external and internal zones. The maximum probability of the presence of *X. fastidiosa* was  
322 0.46 in the area corresponding to the external zone in the stationary model (Fig. 3a), while  
323 it was 0.29 and 0.36 in the continuous and discontinuous barrier models, respectively (Fig.  
324 3e and 3g).

325 Considering the difference between the mean of the posterior predictive distribution of the  
326 stationary model and the continuous barrier model, only positive values were obtained in  
327 the external area of the barrier (Fig. 4b). That is, the probability of *X. fastidiosa* presence

328 was higher with the stationary model, particularly in the northern area adjacent to the  
329 barrier. This same behavior was also observed, but to a lesser extent, when the stationary  
330 and discontinuous barrier models were compared (Fig. 4c). However, the difference  
331 between the discontinuous and continuous barrier models showed that in the areas where  
332 breaks were implemented, the probability of *X. fastidiosa* presence was similar or even  
333 increased, depending on the location. In particular, the probability of presence in the  
334 external area of the barrier increased through the breaks located in the north, while no  
335 differences were observed in those in the south-west (Fig. 4d).

336 With respect to the mountain barrier model, the continuous and discontinuous barrier  
337 models showed a higher probability of *X. fastidiosa* presence in the areas adjacent to the  
338 barrier (Fig. 3e and 3g). This increase in the probability of the presence of the pathogen in  
339 the internal area adjacent to the perimeter barriers was also observed in the difference  
340 between the mean of the posterior predictive distribution of the stationary model and the  
341 continuous and discontinuous barrier models (Fig. 4b and 4c).

## 342 Discussion

343 The occurrence of *X. fastidiosa* in the demarcated area in Alicante was modeled using  
344 hierarchical Bayesian spatial models with the incorporation of barriers, following the  
345 methodology described by Bakka et al. (2019). Here, the main objective was to evaluate  
346 the influence of different types of barriers in the distribution of the pathogen. From the  
347 perspective of the SDMs, the presence of elements in the landscape that prevent or hinder  
348 the spread of the organisms cannot be ignored, since assuming stationarity and isotropy in  
349 this context would give inaccurate results (Bakka et al. 2019). Non-stationary models that

## Barrier effects on *Xylella* distribution

350 incorporate barriers may also allow the effect of disease control interventions to be  
351 simulated.

352 In this case, climatic variables were not included in the models for the occurrence of *X.*  
353 *fastidiosa* in the demarcated area in Alicante. Previous works indicated that these  
354 variables were not relevant in this specific scenario, whereas a strong dominating effect of  
355 the spatial component was observed (Cendoya et al. 2020). Our analysis confirmed the  
356 strong spatial aggregation of *X. fastidiosa* in the demarcated area in Alicante, so the  
357 probability of *X. fastidiosa* presence was increased in the areas with higher prevalence of  
358 the pathogen compared to those where it was not detected (Fig. 3). These results are in  
359 line with other studies highlighting the importance of incorporating the spatial structure in  
360 SDMs for plant pathogens (Meentemeyer et al. 2008).

361 In contrast to previous studies on marine species (Bakka et al. 2019; Martínez-Minaya  
362 et al. 2019), in the case of *X. fastidiosa* the overall values of the posterior predictive  
363 distribution of the stationary model were relatively similar to those obtained with the  
364 models that incorporated barriers (Fig. 3). On the one hand, this was a somewhat  
365 unexpected result, considering that the simulated barriers were assumed to be completely  
366 impervious to the pathogen. On the other hand, the results obtained here somehow  
367 illustrate the actual difficulties involved in effectively containing the spread of the pathogen  
368 by implementing dispersal barriers (Kottelenberg et al. 2021).

369 Nevertheless, relevant differences in the posterior predictive distribution of the probability  
370 of *X. fastidiosa* presence resulting from the incorporation of the barriers in the models can  
371 be appreciated in finer spatial detail. When the area above an altitude of 1,065 m was  
372 considered as a barrier for the spread of *X. fastidiosa*, the main difference with respect to

## Barrier effects on *Xylella* distribution

373 the stationary model was found in the zone adjacent to the barrier. In this area, the  
374 probability of the presence of *X. fastidiosa* was higher in the mountain barrier model than  
375 in the stationary model due to the smoothing effect that occurred when mountains were  
376 not considered as barriers (Fig. 4a).

377 The dimensions and characteristics of the cordon sanitaire, i.e. continuous or discontinuous  
378 perimeter barriers, were based on the spatial range of approximately 4 km obtained in the  
379 stationary model (Table 1). To observe differences when incorporating the perimeter  
380 barrier, it should be situated less than 4 km away from the positive samples. Due to the  
381 assumed impermeability, the width of the perimeter barriers had no influence on the  
382 probability of *X. fastidiosa* presence in the area outside the barrier. This implies that the  
383 width of the barriers used in our study cannot be interpreted in terms of the extent of the  
384 area subjected to disease control measures, such as the removal of infected host plants and  
385 vector control, as established by the Commission Implementing Regulation (EU)  
386 2020/1201.

387 In the continuous barrier model, the probability of the presence of *X. fastidiosa* in the area  
388 adjacent to the outer border of the barrier was only determined by the negative samples  
389 and the intercept (Fig. 3e), resulting in a lower probability of the presence of the pathogen  
390 compared to the stationary model (Fig. 4b). Differences between the discontinuous and  
391 continuous barrier models showed that breaks in the perimeter barrier in areas with low  
392 sampling intensity, due to the greater uncertainty, resulted in a higher probability of *X.*  
393 *fastidiosa* presence (Fig. S3b). The increase in the probability of the presence of the  
394 pathogen through the breaks in the barrier was even greater than the difference with the  
395 stationary model (Fig. 4c). However, no major influence of the cordon sanitaire was

## Barrier effects on *Xylella* distribution

396 observed in areas with a high sampling intensity adjacent to the outer border of the  
397 barrier. In those areas, the breaks in the barrier did not increase the probability of *X.*  
398 *fastidiosa* presence (Fig. S3c).

399 These results may assist plant health authorities in prioritizing the areas for the  
400 implementation of surveillance and disease control barriers. The highest priority would  
401 therefore be given to non-sampled areas close to high occurrence locations, where the  
402 implementation of a barrier would lower the probability of the presence of *X. fastidiosa*.  
403 Areas where the surveys concluded that the pathogen is absent (i.e., below the design  
404 prevalence) would be, therefore, of lower priority for the implementation of surveillance and  
405 disease control barriers, as the breaks would not increase the probability of presence of *X.*  
406 *fastidiosa*. These results are in line with current approaches aiming for a more targeted and  
407 risk-based management of emerging plant pathogens (Parnell et al. 2014; Hyatt-Twynam  
408 et al. 2017).

409 In the context of our study, the spatial aggregation obtained with the models resulted from  
410 the concurrent means of spread of *X. fastidiosa* acting during the whole time span of the  
411 epidemic. For the demarcated area in Alicante, Cornara et al. (2019) indicated that *X.*  
412 *fastidiosa* was detected in *P. spumarius* and *N. campestris*, with a prevalence of 27% and  
413 1.2% of the individuals tested for the bacterium, respectively. However, the references  
414 quoted in this review do not report data on the prevalence of *X. fastidiosa* in vector  
415 populations in this region. Official samplings conducted from 2017 to 2019 by the plant  
416 health authority in the demarcated area resulted in prevalences of *X. fastidiosa* of 0.67%  
417 for *N. campestris* (n = 2,995) and 7.19% for *P. spumarius* (n = 3,157) (GVA 2020).  
418 Similar values have been reported in the Balearic Islands, with 1.12% for *N. campestris* (n

419 = 797) and 8.25% for *P. spumarius* (n = 5,806) (MAPA 2021). However, the prevalence  
420 values in Alicante are much lower than those described for *P. spumarius* in Corsica  
421 (>40%) and Apulia (>50%) (Cruaud et al. 2018; Cornara et al. 2017; Saponari et al.  
422 2014). These data suggest that vectors might not be playing a dominant role in the spread  
423 of the disease in the demarcated area in Alicante. Furthermore, it should be considered  
424 that the probability of infection of a plant by vectors depends not only on the prevalence,  
425 but also on the abundance of infectious vectors, their acquisition rate, transmission  
426 efficiency, the time period of the inoculation process and the infectivity of the vectors  
427 (Purcell 1981). For instance, EFSA (2019) used expert knowledge elicitation (EKE) to  
428 estimate a median acquisition rate of 12.08% and a transmission efficiency of 13.58% for  
429 spittlebug vectors in olives.

430 The dispersal capacity of *X. fastidiosa* vectors in Europe is rather uncertain, and no  
431 studies are available for the particular epidemiological setting in Alicante. According to a  
432 Mass-Mark-Recapture assay by Lago et al. (2020) conducted in Madrid, Spain, individuals  
433 of *N. campestris* were found at a distance of more than 2,000 m from the release point,  
434 with a relatively similar number of catches at 123 and 281 m. Studies conducted with *P.*  
435 *spumarius* in Apulia and Piedmont, Italy, resulted in a median dispersal from the release  
436 point of 26 m day<sup>-1</sup> in an olive grove and 35 m day<sup>-1</sup> in a meadow. It was estimated that  
437 50% of the *P. spumarius* population in olives in Apulia remained within 200 m and 98%  
438 within 400 m for 2 months, with a dispersal limited to some hundreds of meters throughout  
439 the whole year (Bodino et al. 2020). EFSA (2019) conducted EKEs on the uncertainty  
440 distribution of the vector local spread and the mean distance of disease spread. The 5th,  
441 50th and 95th percentiles of the uncertainty distribution for the vector local spread were

## Barrier effects on *Xylella* distribution

442 0.148 km, 0.767 km and 2.204 km, respectively. Percentiles for the mean distance of disease  
443 spread were 1.10 km, 5.18 km and 12.35 km, this median value being included in the 95%  
444 CI of the posterior distribution of the range of our stationary model (Table 1). This upper  
445 bound corresponds to the estimated rate of movement of the *X. fastidiosa* front in Apulia  
446 (Kottelenberg et al. 2021). Nevertheless, these EKEs were conducted under specific  
447 assumptions and their extrapolation to the scenario in Alicante is not straightforward.  
448 Among other assumptions, values were elicited for olive orchards with herbaceous cover,  
449 without the influence of competing hosts or extreme winds on vector behavior. The  
450 movement of propagating plant material was not taken into account either.

451 In fact, plant propagating material is considered the main pathway for the entry of *X.*  
452 *fastidiosa* into new regions EFSA (2019). After the introduction of the pathogen with  
453 imported infected plant material, further spread in the area can also be driven by the  
454 movement of propagating plant material. Studies reconstructing the progression of almond  
455 leaf scorch disease in Majorca indicated that *X. fastidiosa* was introduced into this island  
456 with almond buds or stems from California, and then spread through the archipelago by  
457 grafting (Moralejo et al. 2020). Grafting experiments performed in this study resulted in a  
458 transmission of about 15% with almond buds, but other studies reported values up to 60%  
459 and 80% with almond buds and stems, respectively (Mircetich et al. 1976). In the case of  
460 Alicante, genetic studies indicated that *X. fastidiosa* might also have been introduced from  
461 California (Landa et al. 2020). In the demarcated area in Alicante, almond groves were  
462 typically established with rootstock seeds that were later grafted on site with buds or stems  
463 of the scion (Cambra and Cambra 1991). These grafting materials were generally obtained  
464 from almond trees in the area or from outside when a new cultivar was first introduced. In

## Barrier effects on *Xylella* distribution

465 fact, previous studies suggested that the current extent of the pathogen had arisen from a  
466 single introduction (Cendoya et al. 2020; Landa et al. 2020). Nevertheless, with the  
467 information available, it is not possible to accurately trace back the movement of  
468 propagating plant material in the area and thus determine its actual role in the spread of  
469 *X. fastidiosa*. Therefore, the spatial dependence illustrated by the models should be  
470 interpreted considering any potential means of spread, including propagating plant  
471 material and insect vectors.

472 The ranges obtained with the models varied from approximately 4 to 6 km (Table 1), but  
473 to relate this parameter to the actual epidemiological setting in the demarcated area in  
474 Alicante, only those from the stationary and mountain barrier models should be  
475 considered. The continuous and discontinuous barrier models incorporated simulated  
476 disease control interventions in the form of barriers, which are not present in the study area  
477 as such. Furthermore, imposing a cordon sanitaire implied a strong spatial aggregation in  
478 the area surrounded by this perimeter barrier, resulting in a greater spatial range compared  
479 to the other models studied. The models assuming no control interventions presented  
480 similar spatial dependence for the occurrence of *X. fastidiosa*. The posterior mean of the  
481 range in the stationary model was 4,030.17 m with a 95% CI (2,907.41, 5,563.88), whereas  
482 for the mountain barrier it was 3,860.88 m with a 95% CI (2,918.61, 5,212.18) (Table 1).  
483 Interpreting these values in terms of spread rates is, however, difficult as the contribution  
484 of the different means of pathogen spread cannot be disentangled. Moreover, with the  
485 information available, it is not possible to determine when the pathogen was first  
486 introduced in the area and so the temporal component is missing. Studies combining  
487 dendrochronology and phylogenetic analysis indicated that the introduction of *X. fastidiosa*



## Barrier effects on *Xylella* distribution

488 in Majorca occurred around 1993 (Moralejo et al. 2020). Epidemiological models dated the  
489 introduction of the pathogen in Corsica to around 2001 when hidden infection reservoirs  
490 are not considered, and around 1985 when these non-observable hosts are included in the  
491 models (Soubeyrand et al. 2018). The rate of movement of the invasion front of *X.*  
492 *fastidiosa* in Apulia indicated that the disease spread started in approximately 2008  
493 (Kottelenberg et al. 2021). Based on the low genetic diversity and the absence of  
494 recombinant events (Landa et al. 2020), it can be speculated that *X. fastidiosa* was  
495 introduced in the demarcated area in Alicante not earlier than in Majorca or Corsica.

496 Although spread rates cannot be inferred from our analysis, the spatial component of the  
497 models provides useful information for the management of *X. fastidiosa* in the study area.  
498 In the Matérn correlation function of the stationary and mountain barrier models,  
499 distances up to 1,792 and 1,717 m, respectively, accounted for 50% of the spatial  
500 correlation, and was less than 5% for distances longer than 5,698 and 5,459 m, respectively  
501 (Fig. 2). Regardless of the date of introduction and the weight of the different means of  
502 spread of the pathogen in the demarcated area, the mean value of the range for the  
503 stationary model indicates that host plants that were closer than 4,030.17 m to an infected  
504 plant would be at risk of giving positive for *X. fastidiosa*. Therefore, these distances should  
505 be observed to define the buffer zone where the surveillance activities will be conducted  
506 around the infested area. Originally, the Commission Implementing Decision (EU)  
507 2015/789 established that the buffer zone surrounding the infested zone should have a  
508 width of at least 10 km. The minimum width of the buffer zone was later reduced to 5 km  
509 by the Commission Implementing Decision (EU) 2017/2352 and currently to 2.5 km by the  
510 Commission Implementing Regulation (EU) 2020/1201. Based on our models, these

## Barrier effects on *Xylella* distribution

511 minimum buffer zone widths do not cover the entire area at risk for *X. fastidiosa*  
512 occurrence in the demarcated area in Alicante. Consequently, in 2019 the plant health  
513 authority implemented an additional band of 10 km surrounding the demarcated area,  
514 where official surveillance activities are also being conducted (GVA 2020).

515 It should be noted that the methodological improvement considering the non-stationarity  
516 of the spatial process did not increase the computational cost or the difficulty of its  
517 implementation. In fact, non-stationary models have previously been used in ecology,  
518 mainly in marine species distribution studies where terrestrial areas represent completely  
519 impervious physical barriers (Bakka et al. 2019; Martínez-Minaya et al. 2019). To our  
520 knowledge, this study is the first to apply non-stationary models with barriers in the  
521 context of plant health. However, imposing the condition that barriers are completely  
522 impermeable implies that the pathogen cannot be present or cross this area, which is a very  
523 strong assumption rarely met in practice. In the specific case of *X. fastidiosa*, these barriers  
524 represent areas without host plants and in which it is not possible for infected vectors or  
525 propagating plant material to pass through. Our discontinuous barrier model partially  
526 relaxed this assumption, allowing the pathogen to spread in some areas but still assuming  
527 that parts of the cordon sanitaire were completely impervious, which is seldom the case for  
528 *X. fastidiosa* and plant pathogens in general. Building on the present work, new modeling  
529 methods need to be developed to accommodate the incorporation of barriers with different  
530 levels of permeability, and thus more realistic plant health scenarios may be considered.

## 531 Acknowledgements

532 The present work has received funding from European Union’s Horizon 2020 research and  
533 innovation programme under grant agreement no. 727987 (XF-ACTORS, “*Xylella*  
534 *Fastidiosa* Active Containment Through a Multidisciplinary-Oriented Research Strategy”),  
535 and grant E-RTA 2017-00004-C06-01 FEDER INIA AEI-MCIN and Organización  
536 Interprofesional del Aceite de Oliva Español. DC is also grateful for grant  
537 PID2019-106341GB-I00 FEDER AEI-MCIN. MC holds an IVIA grant partially funded by  
538 the European Social Fund. We thank the Plant Health Service of Generalitat Valenciana  
539 for providing the survey data. Thanks are also due to A. López-Quílez (UV), V. Dalmau  
540 and A. Ferrer (GVA) for their comments on the manuscript.

## 541 Supporting information

542 Additional supporting information may be found at: Appendix\_S1.pdf

## 543 Data availability

544 Data and code are available at <https://doi.org/10.5281/zenodo.4656029>

## 545 Literature cited

546 Almeida, R. P. P., M. J. Blua, J. R. S. Lopes, and A. H. Purcell. 2005. Vector transmission  
547 of *Xylella fastidiosa*: applying fundamental knowledge to generate disease management  
548 strategies. *Annals of the Entomological Society of America*, **98**(6):775–786.

- 549 Almeida, R. P. P. and L. Nunney. 2015. How do plant diseases caused by *Xylella fastidiosa*  
550 emerge? *Plant Disease*, **99**(11):1457–1467.
- 551 Almeida, R. P. P. and A. H. Purcell. 2006. Patterns of *Xylella fastidiosa* colonization on  
552 the precibarium of sharpshooter vectors relative to transmission to plants. *Annals of the*  
553 *Entomological Society of America*, **99**(5):884–890.
- 554 Bakka, H., H. Rue, G.-A. Fuglstad, A. Riebler, D. Bolin, J. Illian, E. Krainski, D. Simpson,  
555 and F. Lindgren. 2018. Spatial modeling with R-INLA: A review. *Wiley Interdisciplinary*  
556 *Reviews: Computational Statistics*, **10**(6):e1443.
- 557 Bakka, H., J. Vanhatalo, J. B. Illian, D. Simpson, and H. Rue. 2019. Non-stationary  
558 Gaussian models with physical barriers. *Spatial Statistics*, **29**:268 – 288.
- 559 Banerjee, S., B. P. Carlin, and A. E. Gelfand. 2004. Hierarchical modeling and analysis for  
560 spatial data. Chapman and Hall/CRC, New York.
- 561 Blangiardo, M. and M. Cameletti. 2015. Spatial and spatio-temporal Bayesian models with  
562 R-INLA. John Wiley & Sons, Chichester, UK.
- 563 Blua, M., K. Campbell, D. Morgan, and R. Redak. 2005. Impact of a screen barrier on  
564 dispersion behavior of *Homalodisca coagulata* (Hemiptera: Cicadellidae). *Journal of*  
565 *Economic Entomology*, **98**(5):1664–1668.
- 566 Bodino, N., V. Cavalieri, C. Dongiovanni, A. Simonetto, M. A. Saladini, E. Plazio,  
567 G. Gilioli, G. Molinatto, M. Saponari, and D. Bosco. 2020. Dispersal of *Philaenus*  
568 *spumarius* (Hemiptera: Aphrophoridae), a vector of *Xylella fastidiosa*, in olive grove and  
569 meadow agroecosystems. *Environmental Entomology*. nvaal40.
- 570 Bosso, L., D. Russo, M. Di Febbraro, G. Cristinzio, and A. Zoina. 2016. Potential

- 571 distribution of *Xylella fastidiosa* in Italy: a maximum entropy model. *Phytopathologia*  
572 *Mediterranea*, **55**(1):62–72.
- 573 Cambra, M. and R. Cambra. 1991. Diseños de plantación y formación de árboles frutales  
574 (8<sup>a</sup> ed.). Cuadernos (Estación Experimental de Aula Dei). CSIC - Estación  
575 Experimental de Aula Dei (EEAD).
- 576 Cendoya, M., J. Martínez-Minaya, V. Dalmau, A. Ferrer, M. Saponari, D. Conesa,  
577 A. López-Quílez, and A. Vicent. 2020. Spatial Bayesian modeling applied to the surveys  
578 of *Xylella fastidiosa* in Alicante (Spain) and Apulia (Italy). *Frontiers in Plant Science*,  
579 **11**:1204.
- 580 Cornara, D., M. Morente, A. Markheiser, N. Bodino, C. W. Tsai, A. Fereres, R. A. Redak,  
581 T. M. Perring, and J. R. Spotti Lopes. 2019. An overview on the worldwide vectors of  
582 *Xylella fastidiosa*. *Entomologia Generalis*, **39**(3-4):157–181.
- 583 Cornara, D., M. Saponari, A. R. Zeilinger, A. D. Stradis, D. Boscia, Giuliana Loconsole,  
584 D. Bosco, G. P. Martelli, R. P. P. Almeida, and F. Porcelli. 2017. Spittlebugs as vectors  
585 of *Xylella fastidiosa* in olive orchards in Italy. *Journal of Pest Science*, **90**(2):521–530.
- 586 Cressie, N. A. C.. 1993. *Statistics for spatial data* (revised edition). John Wiley & Sons,  
587 Inc.
- 588 Cruaud, A., A.-A. Gonzalez, M. Godefroid, S. Nidelet, J.-C. Streito, J.-M. Thuillier, J.-P.  
589 Rossi, S. Santoni, and J.-Y. Rasplus. 2018. Using insects to detect, monitor and predict  
590 the distribution of *Xylella fastidiosa*: a case study in Corsica. *Scientific Reports*,  
591 **8**(1):1–13.
- 592 Daugherty, M. P. and R. P. P. Almeida. 2009. Estimating *Xylella fastidiosa* transmission

- 593 parameters: decoupling sharpshooter number and feeding period. *Entomologia*  
594 *Experimentalis et Applicata*, **132**(1):84–92.
- 595 Denancé, N., B. Legendre, M. Briand, V. Olivier, C. de Boisseson, F. Poliakoff, and M.-A.  
596 Jacques. 2017. Several subspecies and sequence types are associated with the emergence  
597 of *Xylella fastidiosa* in natural settings in France. *Plant Pathology*, **66**(7):1054–1064.
- 598 Diggle, P., J. Tawn, and R. Moyeed. 1998. Model-based geostatistics. *Journal of the Royal*  
599 *Statistical Society: Series C (Applied Statistics)*, **47**(3):299–350.
- 600 Elith, J. and J. R. Leathwick. 2009. Species distribution models: ecological explanation  
601 and prediction across space and time. *Annual Review of Ecology, Evolution, and*  
602 *Systematics*, **40**(1):677–697.
- 603 European and Mediterranean Plant Protection Organization (EPPO). 2019. PM 7/24 (4)  
604 *Xylella fastidiosa*. *EPPO Bulletin*, **49**(2):175–227.
- 605 European Food Safety Authority (EFSA). 2015. Scientific opinion on the risks to plant  
606 health posed by *Xylella fastidiosa* in the EU territory, with the identification and  
607 evaluation of risk reduction options. *EFSA Journal*, **13**(1):3989.
- 608 European Food Safety Authority (EFSA). 2019. Update of the scientific opinion on the  
609 risks to plant health posed by *Xylella fastidiosa* in the EU territory. *EFSA Journal*,  
610 **17**(5).
- 611 European Food Safety Authority (EFSA). 2020. Update of the *Xylella* spp. host plant  
612 database - systematic literature search up to 30 june 2019. *EFSA Journal*, **18**(4).
- 613 Fuglstad, G. A., D. Simpson, F. Lindgren, and H. Rue. 2019. Constructing priors that

- 614 penalize the complexity of Gaussian random fields. *Journal of the American Statistical*  
615 *Association*, **114**(525):445–452.
- 616 Generalitat Valenciana (GVA). 2019. Situación de *Xylella fastidiosa* en la Comunitat  
617 Valenciana, marzo 2019. <http://agroambient.gva.es/documents/163214705/163847802/20190326+Situacion+de+X+fastidiosa+en+C+Valenciana+web.pdf/ab1a7a09-3d26-4b61-9b7a-ab30d72105cf>.  
618  
619 Accessed: 18 February 2021.
- 620
- 621 Generalitat Valenciana (GVA). 2020. Plan de acción frente a *Xylella fastidiosa* en la  
622 Comunitat Valenciana.  
623 [http://agroambient.gva.es/documents/163214705/163847802/Plan+acci3n+Diciembre+2020\\_firmado.pdf/856ce97f-f733-4ea8-8095-88149f6e78e7](http://agroambient.gva.es/documents/163214705/163847802/Plan+acci3n+Diciembre+2020_firmado.pdf/856ce97f-f733-4ea8-8095-88149f6e78e7). Accessed:  
624  
625 18 February 2021.
- 626 Giampetruzzi, A., M. Morelli, M. Saponari, G. Loconsole, M. Chiumenti, D. Boscia, V. N.  
627 Savino, G. P. Martelli, and P. Saldarelli. 2016. Transcriptome profiling of two olive  
628 cultivars in response to infection by the CoDiRO strain of *Xylella fastidiosa* subsp.  
629 *pauca*. *BMC Genomics*, **17**(1):1–18.
- 630 Giampetruzzi, A., M. Saponari, G. Loconsole, D. Boscia, V. N. Savino, R. P. Almeida,  
631 S. Zicca, B. B. Landa, C. Chac3n-Diaz, and P. Saldarelli. 2017. Genome-wide analysis  
632 provides evidence on the genetic relatedness of the emergent *Xylella fastidiosa* genotype  
633 in Italy to isolates from Central America. *Phytopathology*, **107**(7):816–827.
- 634 Godefroid, M., A. Cruaud, J. C. Streito, J. Y. Rasplus, and J. P. Rossi. 2019. *Xylella*  
635 *fastidiosa*: climate suitability of European continent. *Scientific Reports*, **9**(1):8844.

- 636 Guisan, A. and N. E. Zimmermann. 2000. Predictive habitat distribution models in  
637 ecology. *Ecological Modelling*, **135**:147–186.
- 638 Hernández, O. G. and L. V. García. 2019. La dimensión geográfica de las invasiones  
639 biológicas en el Antropoceno: el caso de *Xylella fastidiosa*. *Boletín de la Asociación de*  
640 *Geógrafos Españoles*, (80):1–32.
- 641 Hyatt-Twynam, S. R., S. Parnell, R. O. Stutt, T. R. Gottwald, C. A. Gilligan, and N. J.  
642 Cunniffe. 2017. Risk-based management of invading plant disease. *New Phytologist*,  
643 **214**(3):1317–1329.
- 644 Janse, J. D. and A. Obradovic. 2010. *Xylella fastidiosa*: its biology, diagnosis, control and  
645 risks. *Journal of Plant Pathology*, **92**:S35–S48.
- 646 Kottelenberg, D., L. Hemerik, M. Saponari, and W. van der Werf. 2021. Shape and rate of  
647 movement of the invasion front of *Xylella fastidiosa* spp. *pauca* in Puglia. *Scientific*  
648 *Reports*, **11**:1061.
- 649 Krainski, E., V. Gómez-Rubio, H. Bakka, A. Lenzi, D. Castro-Camilo, D. Simpson,  
650 F. Lindgren, and H. Rue. 2019. Advanced spatial modeling with stochastic partial  
651 differential equations using R and INLA. Chapman and Hall/CRC, Boca Raton.
- 652 Krivanek, A., S. Riaz, and M. Walker. 2006. Identification and molecular mapping of  
653 PdR1, a primary resistance gene to Pierce’s disease in *Vitis*. *Theoretical and Applied*  
654 *Genetics*, **112**(6):1125–1131.
- 655 Lago, C., M. Morente, D. De las Heras-Bravo, A. Marti Campoy, F. Rodriguez-Ballester,  
656 M. Plaza, A. Moreno, and A. Fereres. 2020. Dispersal ability of *Neophilaenus campestris*,



- 657 a vector of *Xylella fastidiosa*, from olive groves to over-summering hosts. bioRxiv.  
658 2020.03.17.995266.
- 659 Landa, B. B., A. I. Castillo, A. Giampetruzzi, A. Kahn, M. Román-Écija, M. P.  
660 Velasco-Amo, J. A. Navas-Cortés, E. Marco-Noales, S. Barbé, E. Moralejo, H. D.  
661 Coletta-Filho, P. Saldarelli, M. Saponari, and R. P. P. Almeida. 2020. Emergence of a  
662 plant pathogen in Europe associated with multiple intercontinental introductions.  
663 Applied and Environmental Microbiology, **86**(3):e01521–19.
- 664 Latimer, A. M., S. Wu, A. E. Gelfand, and J. A. Silander Jr.. 2006. Building statistical  
665 models to analyze species distributions. Ecological Applications, **16**(1):33–50.
- 666 Lindgren, F., H. Rue, and J. Lindström. 2011. An explicit link between Gaussian fields and  
667 Gaussian Markov random fields: the stochastic partial differential equation approach.  
668 Journal of the Royal Statistical Society: Series B (Statistical Methodology),  
669 **73**(4):423–498.
- 670 Madden, L. V., G. Hughes, and F. van den Bosch. 2007. The study of plant disease  
671 epidemics. APS Press, St. Paul, Minnesota.
- 672 Maloy, O. C.. 1993. Plant disease control: principles and practice. John Wiley and Sons,  
673 Inc., New York.
- 674 Martínez-Minaya, J., M. Cameletti, D. Conesa, and M. G. Pennino. 2018. Species  
675 distribution modeling: a statistical review with focus in spatio-temporal issues.  
676 Stochastic Environmental Research and Risk Assessment, **32**(11):3227–3244.
- 677 Martínez-Minaya, J., D. Conesa, H. Bakka, and M. G. Pennino. 2019. Dealing with

- 678 physical barriers in bottlenose dolphin (*Tursiops truncatus*) distribution. Ecological  
679 Modelling, **406**:44–49.
- 680 Meentemeyer, R. K., B. L. Anacker, W. Mark, and D. M. Rizzo. 2008. Early detection of  
681 emerging forest disease using dispersal estimation and ecological niche modeling.  
682 Ecological Applications, **18**(2):377–390.
- 683 Ministerio de Agricultura, Pesca y Alimentación (MAPA). 2021. Anexo I del Reglamento  
684 de Ejecución (UE) 2019/1715 de la Comisión, vigor 14/12/2019).  
685 [http://www.caib.es/sites/xf/ca/ultima\\_notificacion/](http://www.caib.es/sites/xf/ca/ultima_notificacion/). Accessed: 1 April 2021.
- 686 Mircetich, S. M., S. Lowe, W. Moller, and G. Nyland. 1976. Etiology of almond leaf scorch  
687 disease and transmission of the causal agent. Phytopathology, **66**(1):17–24.
- 688 Moralejo, E., M. Gomila, M. Montesinos, D. Borràs, A. Pascual, A. Nieto, F. Adrover,  
689 P. A. Gost, G. Seguí, A. Busquets, J. A. Jurado-Rivera, B. Quetglas, J. d. D. García,  
690 O. Beidas, A. Juan, M. P. Velasco-Amo, B. B. Landa, and D. Olmo. 2020. Phylogenetic  
691 inference enables reconstruction of a long-overlooked outbreak of almond leaf scorch  
692 disease (*Xylella fastidiosa*) in Europe. Communications Biology, **3**(1):1–13.
- 693 Parnell, S., T. Gottwald, T. Riley, and F. Van Den Bosch. 2014. A generic risk-based  
694 surveying method for invading plant pathogens. Ecological Applications, **24**(4):779–790.
- 695 Purcell, A. H.. 1981. Vector preference and inoculation efficiency as components of  
696 resistance to Pierce’s disease in European grape cultivars. Phytopathology, **71**(4):429.
- 697 R Core Team. 2021. R: A Language and Environment for Statistical Computing. R  
698 Foundation for Statistical Computing, Vienna, Austria.
- 699 Rue, H., S. Martino, and N. Chopin. 2009. Approximate Bayesian inference for latent

- 700 Gaussian models by using integrated nested Laplace approximations. Journal of the  
701 Royal Statistical Society: Series B (Statistical Methodology), **71**(2):319–392.
- 702 Saponari, M., G. Loconsole, D. Cornara, R. K. Yokomi, A. De Stradis, D. Boscia,  
703 D. Bosco, G. P. Martelli, R. Krugner, and F. Porcelli. 2014. Infectivity and transmission  
704 of *Xylella fastidiosa* by *Philaenus spumarius* (Hemiptera: Aphrophoridae) in Apulia,  
705 Italy. Journal of Economic Entomology, **107**(4):1316–9.
- 706 Schneider, K., W. van der Werf, M. Cendoya, M. Mourits, J. A. Navas-Cortés, A. Vicent,  
707 and A. O. Lansink. 2020. Impact of *Xylella fastidiosa* subspecies *pauca* in European  
708 olives. Proceedings of the National Academy of Sciences of the United States of America,  
709 **117**(17):9250–9259.
- 710 Soubeyrand, S., P. de Jerphanion, O. Martin, M. Saussac, C. Manceau, P. Hendrikx, and  
711 C. Lannou. 2018. Inferring pathogen dynamics from temporal count data: the emergence  
712 of *Xylella fastidiosa* in France is probably not recent. New Phytologist, **219**(2):824–836.

713 Tables

**Table 1:** Mean and 95% credible interval (CI) for the intercept ( $\beta_0$ ) and hyperparameters ( $r$  and  $\sigma_u$ ) of the models.  $\beta_0$  is the intercept,  $r$  is the range and  $\sigma_u$  is the standard deviation of the spatial effect.

|                       |            | Mean    | 95% CI             |
|-----------------------|------------|---------|--------------------|
| Stationary            | $\beta_0$  | -1.68   | (-2.21, -1.23)     |
|                       | $r$        | 4030.17 | (2907.41, 5563.88) |
|                       | $\sigma_u$ | 1.52    | (1.28, 1.80)       |
| Mountain barrier      | $\beta_0$  | -1.61   | (-2.09, -1.19)     |
|                       | $r$        | 3860.88 | (2918.61, 5212.18) |
|                       | $\sigma_u$ | 1.43    | (1.20, 1.71)       |
| Continuous barrier    | $\beta_0$  | -1.79   | (-2.63, -1.15)     |
|                       | $r$        | 6141.08 | (4296.32, 9042.99) |
|                       | $\sigma_u$ | 1.50    | (1.20, 1.88)       |
| Discontinuous barrier | $\beta_0$  | -1.57   | (-2.23, -1.04)     |
|                       | $r$        | 5298.90 | (3813.16, 7557.78) |
|                       | $\sigma_u$ | 1.44    | (1.17, 1.78)       |

714 Figure legends

715 **Figure 1** – Positive (●) and negative (●) samples for *Xylella fastidiosa* and barriers  
716 incorporated into each model (shaded area). (a) Stationary model, without barriers; (b)  
717 mountain barrier model; (c) continuous barrier model; and (d) discontinuous barrier model.

718 **Figure 2** – Representation of the Matérn correlation function for the posterior mean of the  
719 range obtained in each model.

720 **Figure 3** – Mean (left) and standard deviation (right) of the posterior predictive  
721 distribution of the probability of *Xylella fastidiosa* presence for each model. (a, b)  
722 Stationary model; (c, d) mountain barrier model; (e, f) continuous barrier model; and (g,  
723 h) discontinuous barrier model.

724 **Figure 4** – Differences in the mean of the posterior predictive distribution of the  
725 probability of *Xylella fastidiosa* presence. (a) Difference between stationary model and  
726 mountain barrier model; (b) difference between stationary model and continuous barrier  
727 model; (c) difference between stationary model and discontinuous barrier model; and (d)  
728 difference between discontinuous barrier model and continuous barrier model.

729 Figures

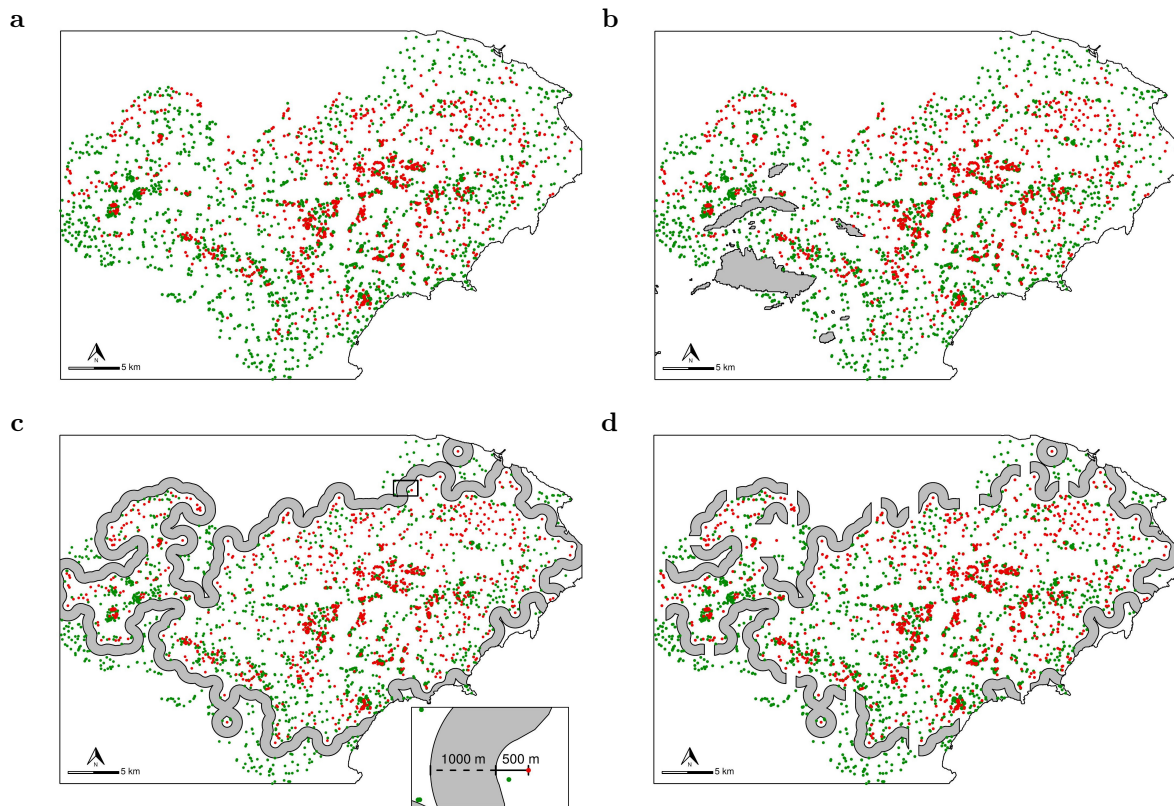

**Figure 1:** Positive (●) and negative (●) samples for *Xylella fastidiosa* and barriers incorporated in each model (shaded area). (a) Stationary model, without barriers; (b) mountain barrier model; (c) continuous barrier model; and (d) discontinuous barrier model.

## Barrier effects on *Xylella* distribution

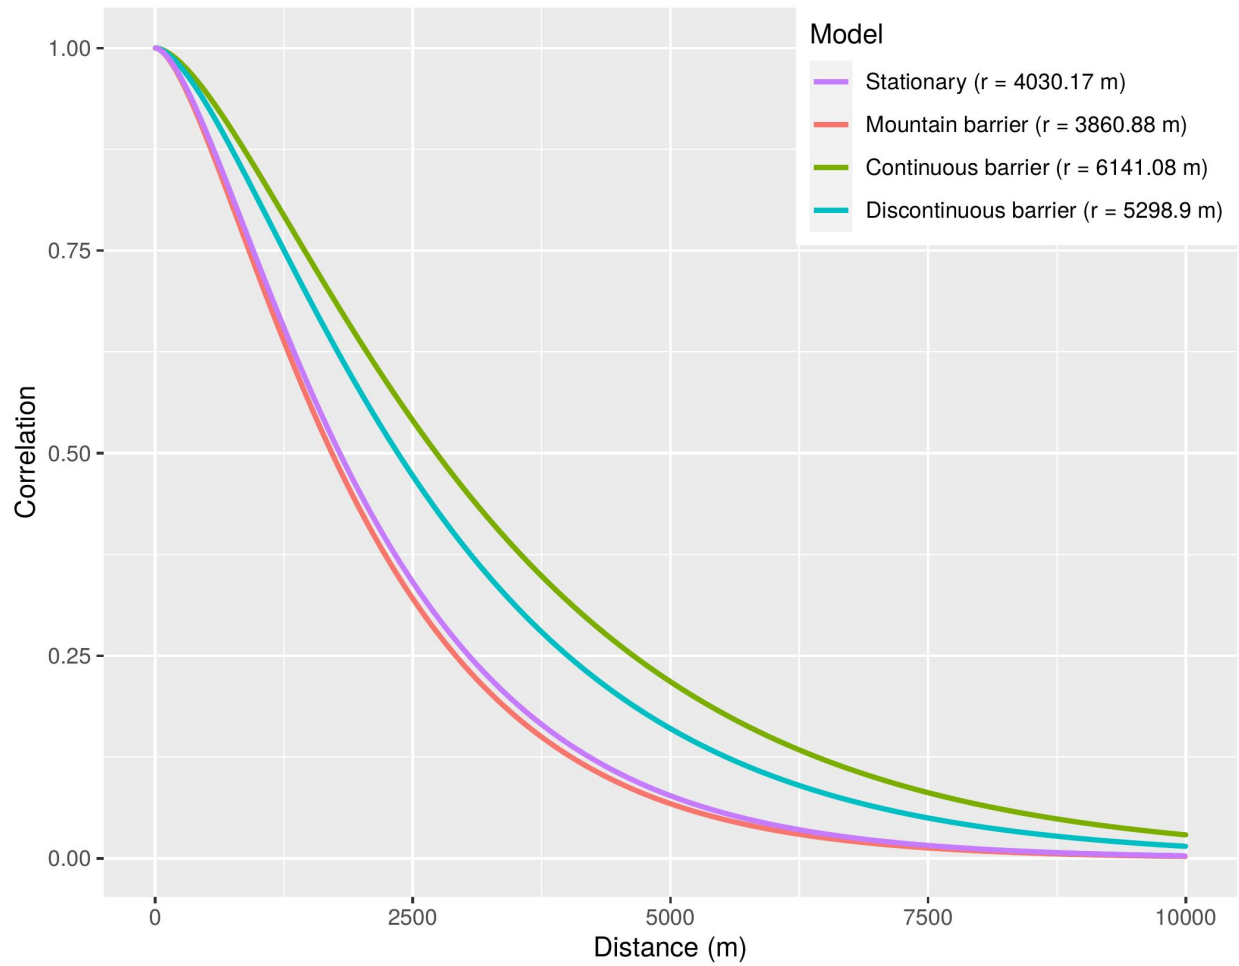

**Figure 2:** Representation of the Matérn correlation function for the posterior mean of the range obtained in each model.



### Barrier effects on *Xylella* distribution

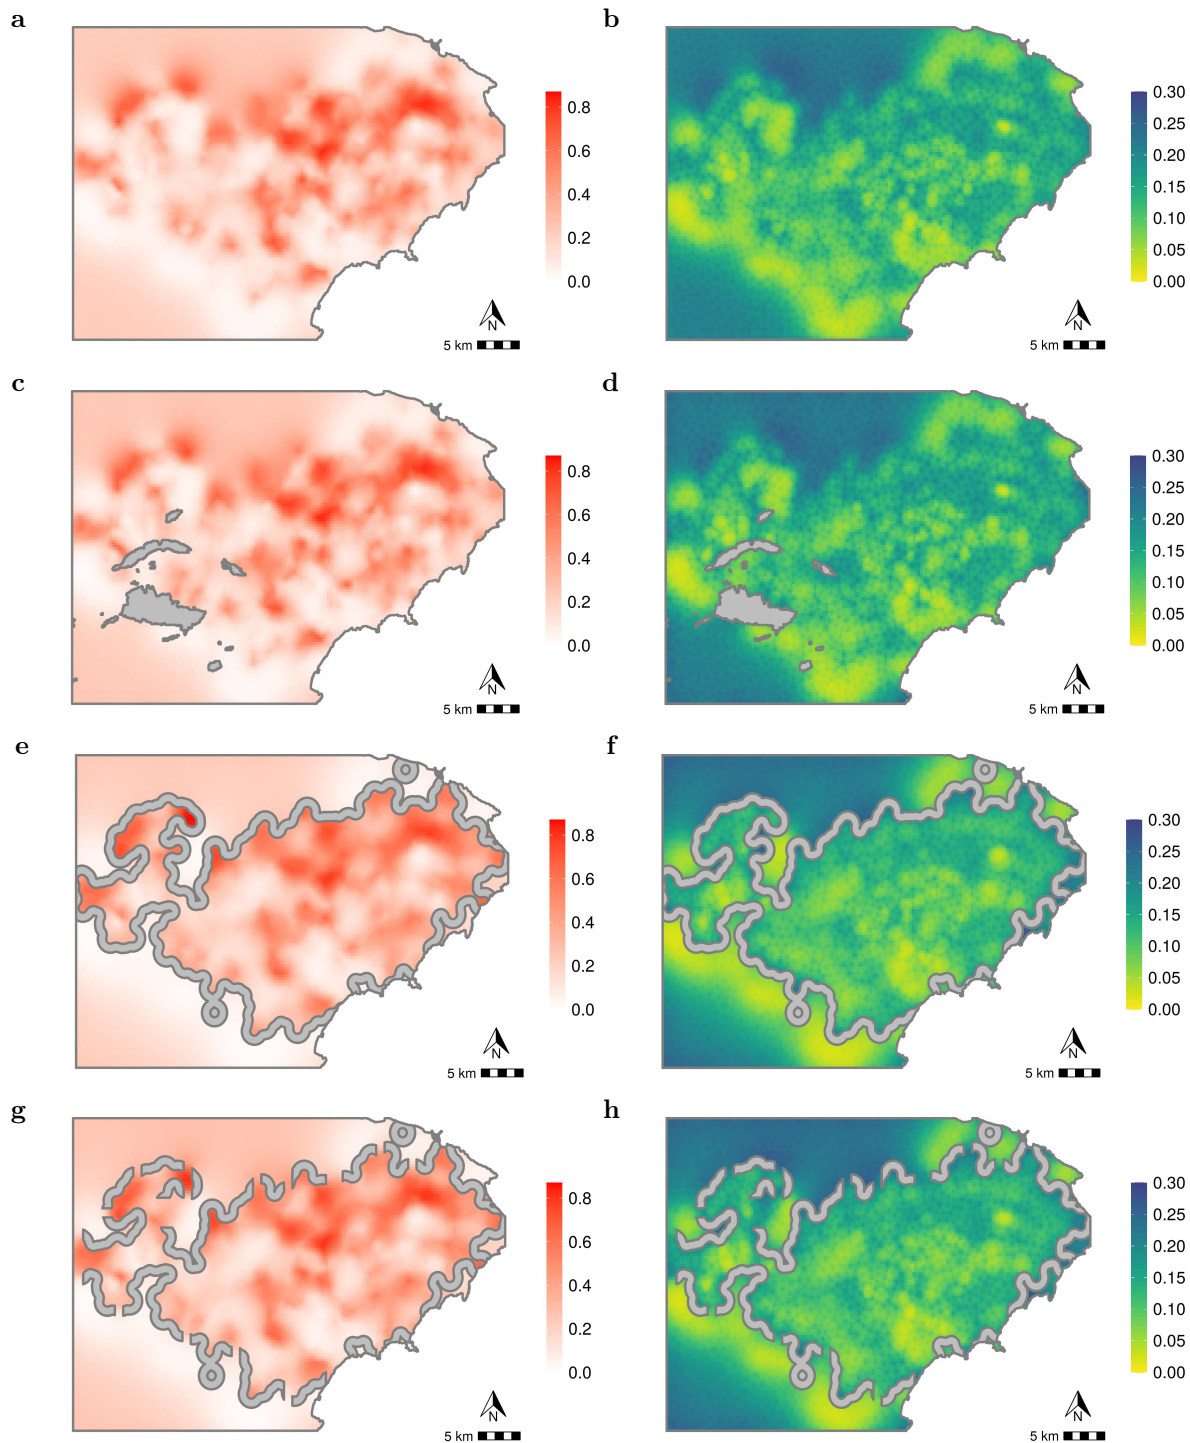

**Figure 3:** Mean (left) and standard deviation (right) of the posterior predictive distribution of the probability of *Xylella fastidiosa* presence for each model. (a, b) Stationary model; (c, d) mountain barrier model; (e, f) continuous barrier model; and (g, h) discontinuous barrier model.



## Barrier effects on *Xylella* distribution

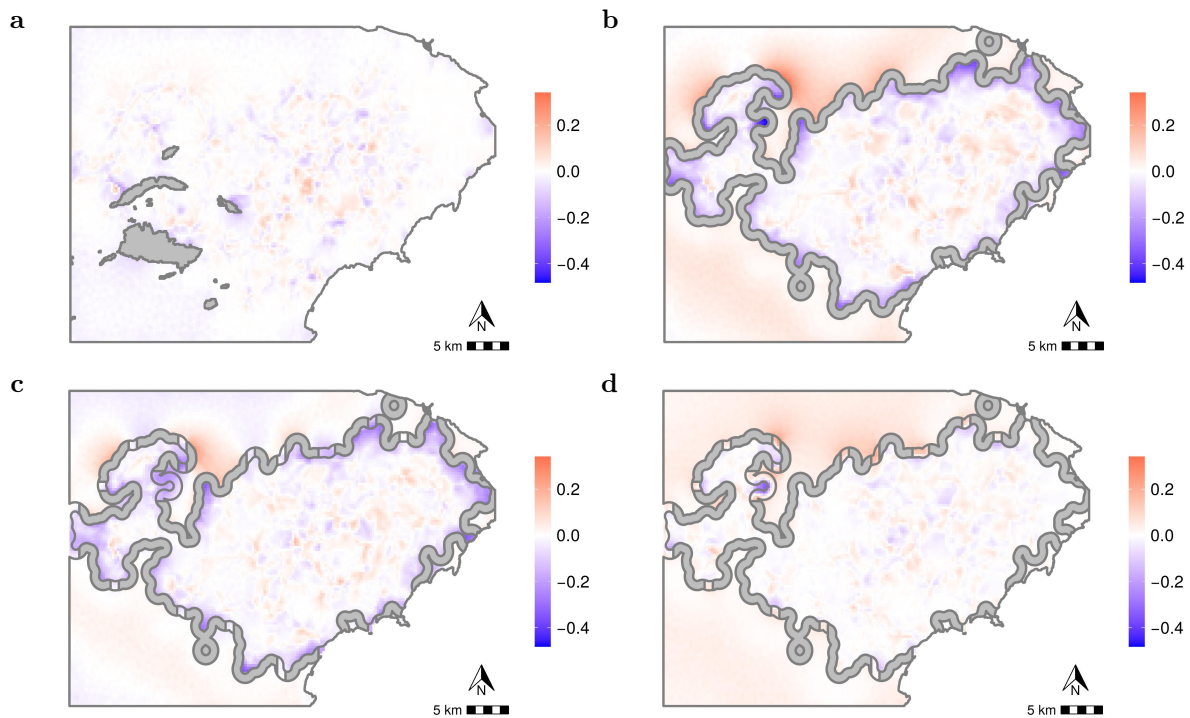

**Figure 4:** Differences in the mean of the posterior predictive distribution of the probability of *Xylella fastidiosa* presence. (a) Difference between stationary model and mountain barrier model; (b) difference between stationary model and continuous barrier model; (c) difference between stationary model and discontinuous barrier model; and (d) difference between discontinuous barrier model and continuous barrier model.
